# 1 **Bacterial metatranscriptomes in wastewater can differentiate virally** 2 **infected human populations**

3 **(9/10 words)**

4 Rodolfo A Salido<sup>1,2,4</sup>, Cameron Martino<sup>1,3,4</sup>, Smruthi Karthikeyan<sup>1</sup>, Shi Huang<sup>1,4</sup>, Gibraan  
5 Rahman<sup>1,5</sup>, Antonio Gonzalez<sup>1</sup>, Livia S. Zaramela<sup>1</sup>, Kristen L Beck<sup>6</sup>, Shrikant Bhute<sup>4</sup>, Kalen  
6 Cantrell<sup>4,5</sup>, Anna Paola Carrieri<sup>7</sup>, Sawyer Farmer<sup>1</sup>, Niina Haiminen<sup>8</sup>, Greg Humphrey<sup>1</sup>, Ho-Cheol  
7 Kim<sup>6</sup>, Laxmi Parida<sup>8</sup>, Alex Richter<sup>4</sup>, Yoshiki Vázquez-Baeza<sup>4</sup>, Karsten Zengler<sup>1,2</sup>, Austin D.  
8 Swafford<sup>4</sup>, Andrew Bartko<sup>4</sup>, Rob Knight<sup>1,2,4,5</sup>

- 9 1. Department of Pediatrics, School of Medicine, University of California San Diego, La  
10 Jolla, CA, USA.  
11 2. Department of Bioengineering, University of California San Diego, La Jolla, CA, USA.  
12 3. Bioinformatics and Systems Biology Program, Jacobs School of Engineering, University  
13 of California San Diego, La Jolla, CA, USA.  
14 4. Center for Microbiome Innovation, Jacobs School of Engineering, University of California  
15 San Diego, La Jolla, CA, USA.  
16 5. Department of Computer Science and Engineering, Jacobs School of Engineering,  
17 University of California San Diego, La Jolla, CA, USA.  
18 6. AI and Cognitive Software, IBM Research-Almaden, San Jose, CA, USA.  
19 7. IBM Research Europe - Daresbury, UK.  
20 8. IBM T.J Watson Research Center, Yorktown Heights, New York, USA.

21

22 Corresponding author: [robknight@eng.ucsd.edu](mailto:robknight@eng.ucsd.edu)

23

## 24 **Abstract:**

25 Monitoring wastewater samples at building-level resolution screens large populations for SARS-  
26 CoV-2, prioritizing testing and isolation efforts. Here we perform untargeted metatranscriptomics  
27 on virally-enriched wastewater samples from 10 locations on the UC San Diego campus,  
28 demonstrating that resulting bacterial taxonomic and functional profiles discriminate SARS-CoV-  
29 2 status even without direct detection of viral transcripts. Our proof-of-principle reveals  
30 emergent threats through changes in the human microbiome, suggesting new approaches for  
31 untargeted wastewater-based epidemiology.

32

## 33 **Keywords:**

34 COVID-19, SARS-CoV-2, high-throughput, automation, global health, wastewater,  
35 metatranscriptomics

36

37 **Body:**

38 Our past work deploying a highly spatially resolved, high-throughput wastewater monitoring  
39 system on a college campus (1) enabled collection and qPCR characterization of thousands of  
40 wastewater samples, identifying 85% of SARS-CoV-2 clinical cases (2), and also enabling  
41 genomic surveillance for emerging variants of concern by complete genome sequencing from  
42 extracted RNA (3). Wastewater-based epidemiology (WBE) provides additional advantages in  
43 that it is (i) non-invasive, (ii) cost-effective relative to individual clinical testing, (iii) does not  
44 require individuals to consent to clinical testing that is often reported to public health agencies,  
45 and (iv) can therefore benefit under-served populations (4-6). However, this WBE scheme is  
46 currently limited to pathogen detection and characterization through targeted qPCR and  
47 sequencing, and cannot detect agents of disease for which a screening test has not been  
48 developed.

49  
50 Here we describe an untargeted community/population level disease monitoring strategy using  
51 metatranscriptomics, which leverages correlations in observable changes in wastewater  
52 microbiomes with human microbiome disruptions associated with disease state. SARS-CoV-2,  
53 like many pathogens, has been reported to cause systematic disruptions in the human gut  
54 microbiome (7-9), which is the principal human microbial input to wastewater (10). We  
55 employed this strategy to test whether information in the wastewater metatranscriptome could  
56 discriminate SARS-CoV-2 positive from negative wastewater samples (assessed by qPCR) as a  
57 proof-of-principle.

58  
59 We present a high-throughput wastewater metatranscriptomics pipeline that lowers the  
60 accessibility to an otherwise cost-prohibitive sequencing method at scale through  
61 miniaturization, parallelization, and automation (11-12). (**Sup. Fig. S1**) Using this pipeline, we  
62 generated metatranscriptomics sequencing data for 313 virally-enriched (VE) wastewater  
63 samples collected from manholes servicing different residential buildings across a college  
64 campus, including isolation housing buildings (Manhole IDs: C6M095-C6M098), from Nov 23  
65 2020 to January 7 2021. Sequencing reads were demultiplexed, trimmed, and quality filtered  
66 before being deposited in Qiita (13), where ribosomal reads were removed using SortMeRNA  
67 (14) using default processing recommendations; non-ribosomal reads were aligned to genomes  
68 or genes using Woltka (15) resulting in two different feature tables: taxonomic and functional  
69 (details in Materials and Methods).

70  
71 Samples obtained from each manhole have a distinct microbiome signature, likely a composite  
72 of the individual microbiomes of the people contributing to each wastewater stream. Beta-  
73 diversity analyses of both metatranscriptomic feature tables (taxonomic and functional)  
74 measured by Aitchison distance and robust Aitchison principal component analysis (RPCA) (16)  
75 reveal that wastewater samples cluster primarily by manhole source (manhole\_id) (**Fig. 1A**),  
76 with a stronger signal than SARS-CoV-2 detection status (**Fig. 1B**)(**Sup. Table ST1**).  
77 Wastewater samples separate according to SARS-CoV-2 status based on these bacterial  
78 profiles alone, but this signal is obscured in the RPCA ordination by the stronger manhole\_id  
79 clustering effect. Taxonomic features provide better separation by both SARS-CoV-2 status and  
80 manhole\_id than functional features (**Sup. Table ST1**), suggesting that microbial community

81 membership rather than current functional gene expression is more strongly affected by  
82 infection.

83

84 To test whether the SARS-CoV-2 detection status-dependent microbiome signal can be  
85 identified even against the stronger manhole\_id clustering effect, we selected a subset of  
86 samples for paired comparisons between SARS-CoV-2 positive and negative samples within  
87 specific manholes across one week (selection process detailed in Materials and Methods). This  
88 subset (squares,  $n=28$  **Fig. 1A-B**) was analyzed by dimensionality reduction with compositional  
89 tensor factorization (CTF) (17), which accounts for the intra-manhole sample correlation. The  
90 resulting ordination shows that samples of the microbiome in any specific manhole undergo a  
91 pronounced shift along one of the main principal components (PC1 for taxonomic, PC2 for  
92 functional), when the subject population it services becomes infected with SARS-CoV-2 (**Fig.**  
93 **1C-D**). Consequently, taxonomic features (genomes) that drive segregation along PC2 (**Fig.**  
94 **1E**), or functional features (genes) along PC1 (**Fig. 1F**), can be positively or negatively  
95 correlated with SARS-CoV-2 detection. Log-ratio analysis of the top and bottom ranked  
96 taxonomic features as numerator and denominator respectively show a significant difference in  
97 the means of the SARS-CoV-2 detection sample groupings (**Fig. 1G**). Similarly, a log-ratio of six  
98 functional features positively and negatively ranked along PC2 also shows a significant  
99 difference in the means of the SARS-CoV-2 detection sample groupings (**Fig. 1H**) (see  
100 Materials and Methods).

101

102 The predictive power for wastewater SARS-CoV-2 status discrimination of the features selected  
103 through CTF analysis was validated via log-ratios and random forest machine learning (RFML)  
104 classification, using the remaining samples in this study (circles, **Fig. 1A-B**) plus an additional  
105 validation set (total  $n=285$ , positive= $179$ , negative= $106$ , **Sup. Table ST2**). Log-ratios of selected  
106 taxonomic and functional features showed a significant difference by SARS-CoV-2 detection  
107 status across the validation sample set, with function ( $t$ -test,  $T=-3.9$   $p=0.0001$ ) (**Fig. 2A**) showing  
108 a smaller effect than taxonomy ( $t$ -test,  $T=-8.8$ ,  $p=1.3e-16$ ) (**Fig. 2B**). Type II ANOVA of both log-  
109 ratios shows that differences in sample means are larger across SARS-CoV-2 status groups  
110 than manhole\_id or sample\_plate confounders (**Sup. Fig. S2**). The performances of the RFML  
111 classification models were evaluated through average area under the curve of precision-recall  
112 (AUC-PR) tests of stratified 5-fold cross validation classification tasks distinguishing samples'  
113 SARS-CoV-2 status, manhole\_id, and sample\_plate. Lower dimensional feature tables from  
114 feature selection show comparable SARS-CoV-2 status classification performance as full  
115 feature tables for both data modalities (taxonomic and functional) (**Fig. 2C**), but reduced  
116 classification performance when distinguishing confounding manhole\_id (**Fig. 2D**) or  
117 sample\_plate (**Sup. Fig. S3**).

118

119 Our results demonstrate that wastewater metatranscriptomes can reveal traces of rare  
120 pathogens through alterations of the microbiome of the afflicted individuals, which are eventually  
121 reflected in the wastewater microbiome. When effects are confounded by site/population,  
122 leveraging generalizable log-ratios separating positive/negative groupings across sites reduces  
123 overfitting. This proof-of-principle justifies further research on high-throughput wastewater  
124 metatranscriptome biomarker discovery for WBE; the untargeted nature of this data modality

125 makes it flexible enough to monitor multiple diseases at the population scale (through traditional  
126 direct detection of known sequences from pathogens, but also by leveraging microbiome  
127 perturbations as a proxy), and is superior to metagenomic monitoring because it encompasses  
128 all living organisms and viruses(18). One of the limitations of the proposed strategy is the  
129 narrow stability of the samples' RNA molecules. However, our methods don't claim to  
130 comprehensively characterize the wastewater metatranscriptome and instead focus on the fact  
131 that changes in the observable bacterial metatranscriptome are sufficient to discriminate the  
132 wastewater's viral status, with SARS-CoV-2 detection status serving as a relevant case study.  
133 Although key features of the bacterial metatranscriptome discriminate SARS-CoV-2 detection,  
134 further work is needed to determine how broadly this phenomenon generalizes to other  
135 pathogens. Lastly, our methodology allows automated high-throughput metatranscriptomics  
136 processing, applicable to many biospecimen types, and could have considerable impact beyond  
137 WBE.

138

### 139 **Acknowledgments**

140 This work is supported in part by the IBM Research AI through the AI Horizons Network, IBM  
141 Artificial Intelligence for Healthy Living (A1770534), UC San Diego's Return to Learn Program,  
142 NIH Director's Pioneer Award (DP1AT010885), NSF RAPID Award (# 2038509), and Emerald  
143 Foundation Distinguished Investigator Award.

144

### 145 **Conflict of Interest:**

146 A.D.S. is currently Chief Technology Officer of InterOme, Inc. a digital health company which  
147 offers wastewater testing and monitoring of pathogens including SARS-CoV-2 among its  
148 services

149

150 **References:**

- 151 1. Karthikeyan, S. *et al.* High-Throughput Wastewater SARS-CoV-2 Detection Enables  
152 Forecasting of Community Infection Dynamics in San Diego County. *mSystems* **6**,  
153 (2021).
- 154 2. Karthikeyan, S. *et al.* Rapid, Large-Scale Wastewater Surveillance and Automated  
155 Reporting System Enable Early Detection of Nearly 85% of COVID-19 Cases on a  
156 University Campus. *mSystems* **6**, 793–814 (2021).
- 157 3. Karthikeyan, S. *et al.* Wastewater sequencing uncovers early, cryptic SARS-CoV-2  
158 variant transmission. *medRxiv*2021.12.21.21268143 (2021).  
159 doi:10.1101/2021.12.21.21268143
- 160 4. Fielding-Miller, R. *et al.* Wastewater and surface monitoring to detect COVID-19 in  
161 elementary school settings: The Safer at School Early Alert project. *medRxiv*  
162 2021.10.19.21265226 (2021). doi:10.1101/2021.10.19.21265226
- 163 5. Reitsma, M. B. *et al.* Racial/ethnic disparities in covid-19 exposure risk, testing, and  
164 cases at the subcounty level in California. *Health Aff.* **40**, 870–878 (2021).
- 165 6. Lieberman-Cribbin, W., Tuminello, S., Flores, R. M. & Taioli, E. Disparities in COVID-  
166 19 Testing and Positivity in New York City. *Am. J. Prev. Med.* **59**, 326–332 (2020).
- 167 7. Wu, Y. *et al.* Altered oral and gut microbiota and its association with SARS-CoV-2 viral  
168 load in COVID-19 patients during hospitalization. *npj Biofilms Microbiomes* **7**, 61  
169 (2021).
- 170 8. Xu, R. *et al.* Temporal association between human upper respiratory and gut bacterial  
171 microbiomes during the course of COVID-19 in adults. *Commun. Biol.* 2021 **41** **4**,  
172 1–11 (2021).
- 173 9. Gu, S. *et al.* Alterations of the Gut Microbiota in Patients With Coronavirus Disease  
174 2019 or H1N1 Influenza. *Clin. Infect. Dis.* **71**, 2669–2678 (2020).
- 175 10. Newton, R. J. *et al.* Sewage reflects the microbiomes of human populations. *MBio* **6**,  
176 (2015).
- 177 11. Sboner, A., Mu, X. J., Greenbaum, D., Auerbach, R. K. & Gerstein, M. B. The real  
178 cost of sequencing: Higher than you think! *Genome Biol.* **12**, 1–10 (2011).
- 179 12. Mayday, M. Y., Khan, L. M., Chow, E. D., Zinter, M. S. & DeRisi, J. L. Miniaturization  
180 and optimization of 384-well compatible RNA sequencing library preparation. *PLoS*  
181 *One* **14**, e0206194 (2019).

- 182 13. Gonzalez, A. *et al.* Qiita: rapid, web-enabled microbiome meta-analysis. *Nat. Methods*  
183 **15**, 796–798 (2018).
- 184 14. Kopylova, E., Noé, L. & Touzet, H. SortMeRNA: fast and accurate filtering of  
185 ribosomal RNAs in metatranscriptomic data. *Bioinformatics* **28**, 3211–3217 (2012).
- 186 15. Zhu, Q. *et al.* OGUes enable effective, phylogeny-aware analysis of even shallow  
187 metagenome community structures. *bioRxiv* 2021.04.04.438427 (2021).  
188 doi:10.1101/2021.04.04.438427
- 189 16. Martino, C. *et al.* A Novel Sparse Compositional Technique Reveals Microbial  
190 Perturbations. *mSystems* **4**, e00016-19 (2019).
- 191 17. Martino, C. *et al.* Context-aware dimensionality reduction deconvolutes gut microbial  
192 community dynamics. *Nat. Biotechnol.* 2020 392 **39**, 165–168 (2020).
- 193 18. Sims, N. & Kasprzyk-Hordern, B. Future perspectives of wastewater-based  
194 epidemiology: Monitoring infectious disease spread and resistance to the  
195 community level. *Environ. Int.* **139**, 105689 (2020).

196

197

198

199 **Figures: (223 words, excluding supplementary figs)**

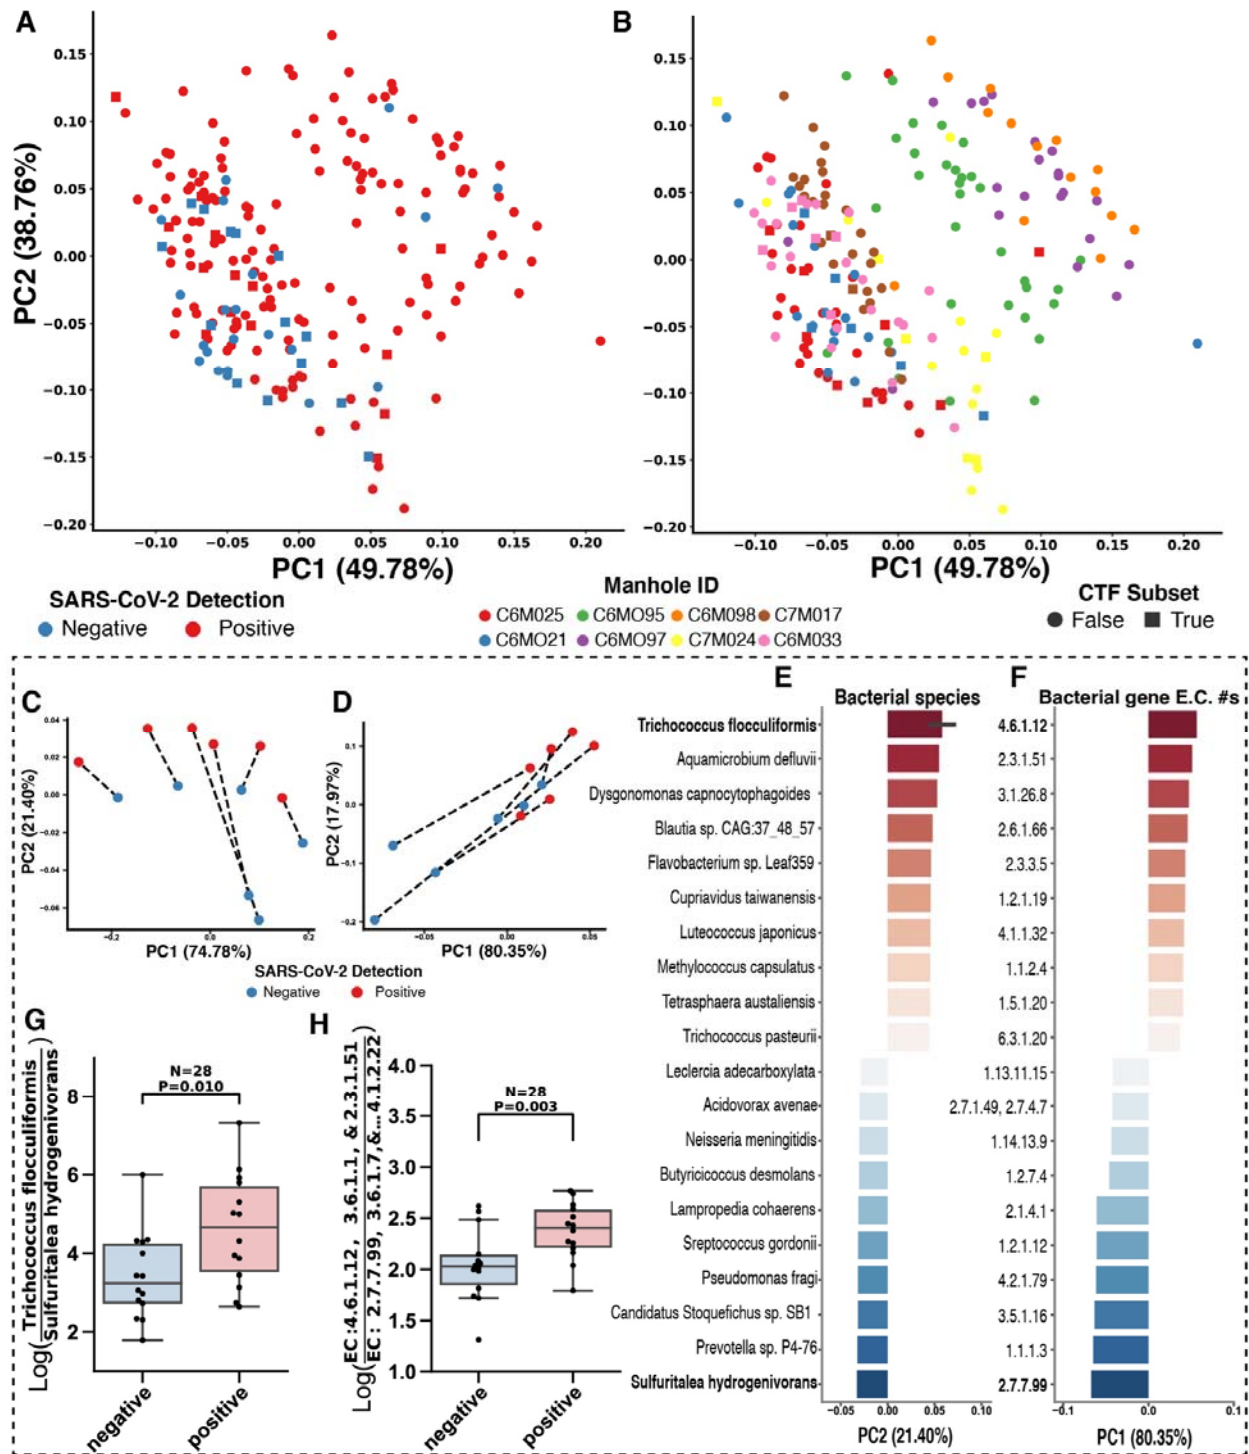

200  
 201 **Figure 1: Microbial community composition changes can be observed in SARS-CoV-2**  
 202 **positive vs. negative wastewater samples.** Robust principal component analysis (RPCA) of  
 203 wastewater samples colored by SARS-CoV-2 detection status (A) and manhole source (B). A  
 204 subset of samples (squares) was selected for pairwise comparisons of SARS-CoV-2 positive  
 205 and negative wastewater microbiomes within a manhole and a week using compositional tensor

206 factorization (CTF) on taxonomic (genomes, **C**) and functional (genes, **D**) features. Results  
 207 shown in the dashed box are exclusive to this subset of samples. Important bacterial genomes  
 208 (**E**) and genes (**F**) identified from CTF show significant differences between positive and  
 209 negative sample groupings by log-ratios of top and bottom ranked features respectively (**G-H**).  
 210 Error bar on the x-axis of the ranked features plot represents the standard error in the PC2 loadings  
 211 across strains within the same species. The log-ratio boxplot elements are defined as follows: the  
 212 centerline is the median of the distribution, box limits represent upper and lower quartiles,  
 213 whiskers span 1.5x of the interquartile range, and points represent all data points.  
 214

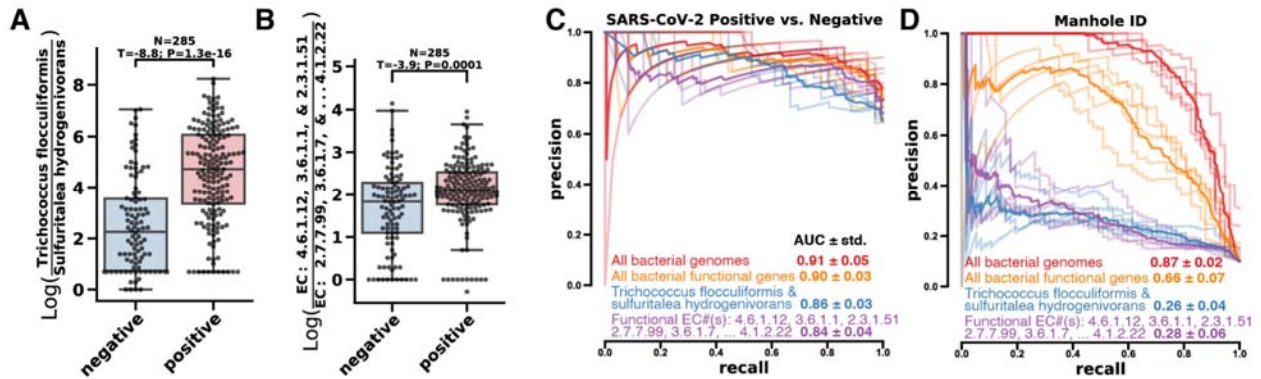

215  
 216 **Figure 2: Key bacterial features identified in small paired subset show significant**  
 217 **differences in larger validation dataset and provide RFML the ability to accurately predict**  
 218 **SARS-CoV-2 status but not manhole source in wastewater.** Log-ratios of important features,  
 219 taxonomic (**A**) and functional (**B**), identified by CTF significantly separate wastewater samples  
 220 by SARS-CoV-2 detection status in the remaining samples not included in the CTF subset. The  
 221 log-ratio boxplot elements are defined as follows: the centerline is the median of the distribution,  
 222 box limits represent upper and lower quartiles, whiskers span 1.5x of the interquartile range,  
 223 and points represent all data points. **C**) Random forest machine learning 5-fold cross-validation  
 224 shows high precision-recall of samples with positive SARS-CoV-2 detection status from  
 225 taxonomic and functional tables with all features or a few selected features. **D**) Feature selection  
 226 reduces Manhole ID classification performance while retaining SARS-CoV-2 discrimination,  
 227 suggesting a reduction of overfitting. The translucent precision-recall curve traces of each  
 228 feature table reflect all 5-fold cross-validation results while the bold trace represents the  
 229 average.



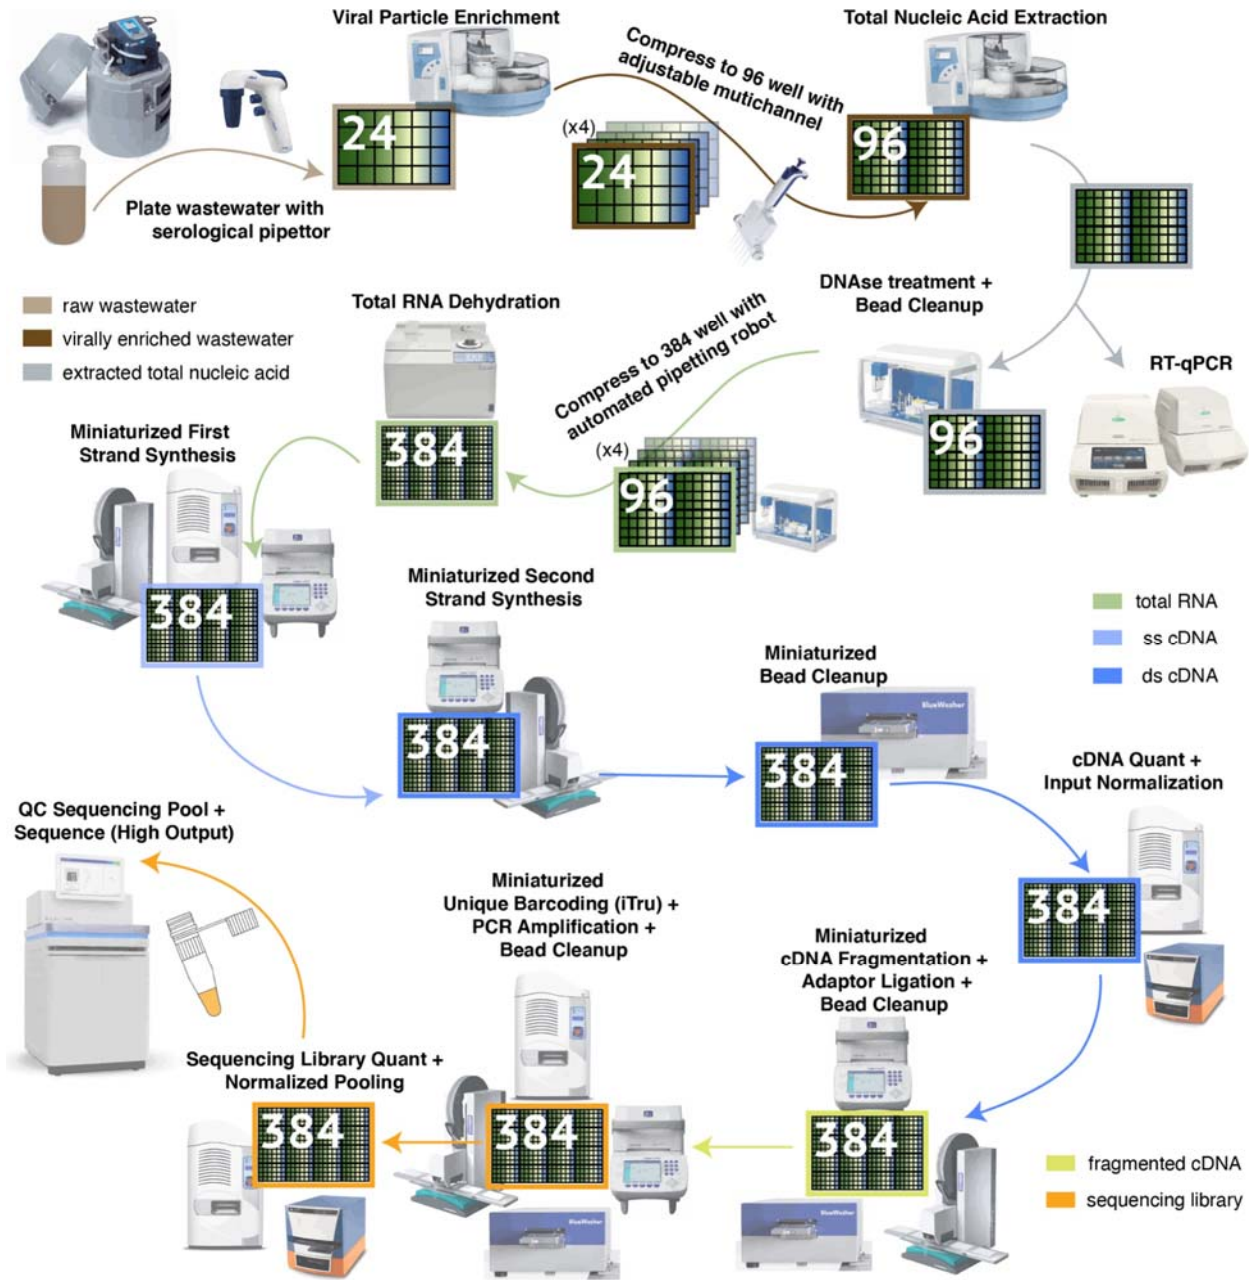

230  
231  
232  
233  
234  
235  
236  
237  
238  
239  
240  
241

**Supplementary Figure S1: High Throughput pipeline for Virally Enriched (VE) wastewater metatranscriptomics.** Flow diagram of metatranscriptomic data generation from VE wastewater samples, from auto-sampler to sequencer. Key robotic instrumentation and tools are depicted alongside each step. The flow diagram is color coded according to the different stages of sample processing. The high throughput pipeline increases sample processing parallelization through incremental compression of samples from 24-well plates to 384-well plates. Significant per sample cost savings are achieved through miniaturization of molecular reactions in 384-well format, for which specialized low volume liquid handling infrastructure is needed.

242  
243  
244  
245  
246  
247

|                        |                   |                   | PERMANOVA: F-stat. | PERMANOVA: p-value |
|------------------------|-------------------|-------------------|--------------------|--------------------|
| <b>across-<br/>all</b> | <b>taxonomic</b>  | manhole_id        | 23.9008            | 0.0002             |
|                        |                   | time_encoded      | 0.8869             | 0.7321             |
|                        |                   | sars_cov_2_status | 8.8129             | 0.0002             |
|                        |                   | sample_plate      | 21.2303            | 0.0002             |
|                        | <b>functional</b> | manhole_id        | 11.9542            | 0.0002             |
|                        |                   | time_encoded      | 0.9860             | 0.5055             |
|                        |                   | sars_cov_2_status | 4.0365             | 0.0180             |
|                        |                   | sample_plate      | 9.1532             | 0.0002             |

248  
249  
250  
251  
252  
253  
254  
255

**Supplementary Table ST1: PERMANOVA results on RPCA distance matrix show stronger manhole of origin effect than SARS-CoV-2 status.** An analysis of variance of the Aitchison distance between wastewater samples shows that manhole of origin has the strongest effect size, followed by sample processing plate, and SARS-CoV-2 status. Samples from different manholes were not uniformly distributed across sample processing plates, confounding the effect sizes for both independent variables.

256

| sample_plate   | manhole_id | sars_cov_2_status | samples |
|----------------|------------|-------------------|---------|
|                | C1Mo31     | negative          | 37      |
|                |            | positive          | 6       |
| Sample_Plate_1 | C3Mo42     | negative          | 38      |
|                | C6Mo21     | negative          | 7       |
|                |            | positive          | 5       |
|                | C6Mo21     | negative          | 5       |
|                |            | positive          | 16      |
| Sample_Plate_2 | C6Mo25     | negative          | 10      |
|                |            | positive          | 19      |
|                | C6Mo95     | positive          | 15      |
|                |            |                   |         |
|                | C6Mo33     | negative          | 2       |
|                |            | positive          | 7       |
| Sample_Plate_3 | C6Mo95     | positive          | 22      |
|                |            |                   |         |
|                | C6Mo97     | positive          | 22      |
|                |            |                   |         |
|                | C6Mo98     | negative          | 3       |
|                |            | positive          | 12      |
|                | C6Mo33     | positive          | 14      |
|                |            |                   |         |
| Sample_Plate_4 | C7Mo17     | negative          | 1       |
|                |            | positive          | 29      |
|                | C7Mo24     | negative          | 3       |
|                |            | positive          | 12      |
| TOTAL          |            |                   | 285     |

257

258 **Supplemental Table ST2: Description of validation dataset for Random Forest Machine**  
 259 **Learning (RFML).** Distribution of samples across different groupings relevant to the observed  
 260 variance in the unsupervised learning analysis. Sample plate 1 was added, as an additional  
 261 validation set, to the RFML analyses. The validation dataset excludes the subset of samples  
 262 selected for the CTF analysis (n=28).  
 263

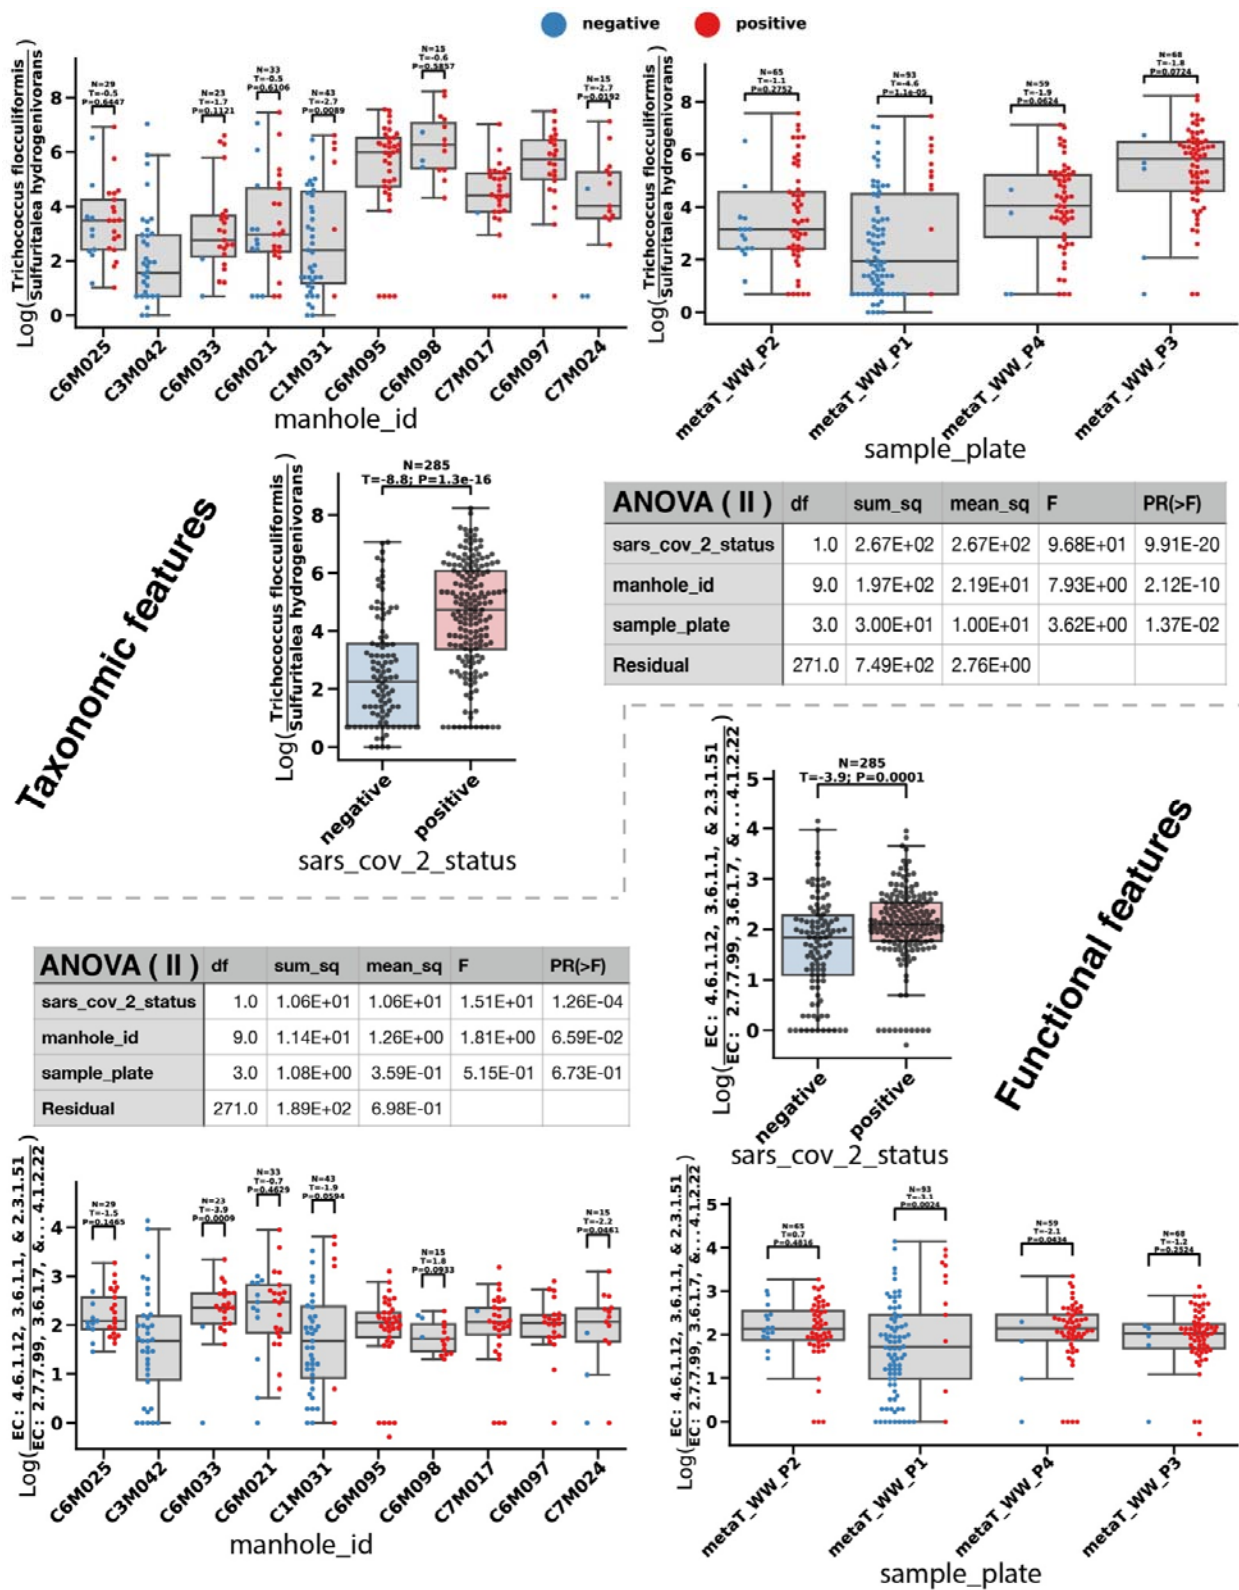

264  
 265 **Supplementary Figure S2: Analysis of variance (ANOVA) of both log-ratios show that**  
 266 **SARS-CoV-2 status has the strongest effect size.** Boxplots with overlaid swarmplots show  
 267 the distribution of selected log-ratios for both taxonomic and functional feature tables, grouped

268 by relevant sample metadata. The log-ratio boxplot elements are defined as follows: the  
269 centerline is the median of the distribution, box limits represent upper and lower quartiles,  
270 whiskers span 1.5x of the interquartile range, and points represent all data points. Results from  
271 ANOVA (type II) analyses are shown as tables for each feature modality. Statistical tests results  
272 (Student's *t*-test) between SARS-CoV-2 status subgroupings (negative=blue / positive=red) in  
273 manhole\_id and sample\_plate plots are also shown, evidencing that the log-ratios generalize  
274 and perform better at discriminating SARS-CoV-2 status across all samples than within specific  
275 manholes.  
276

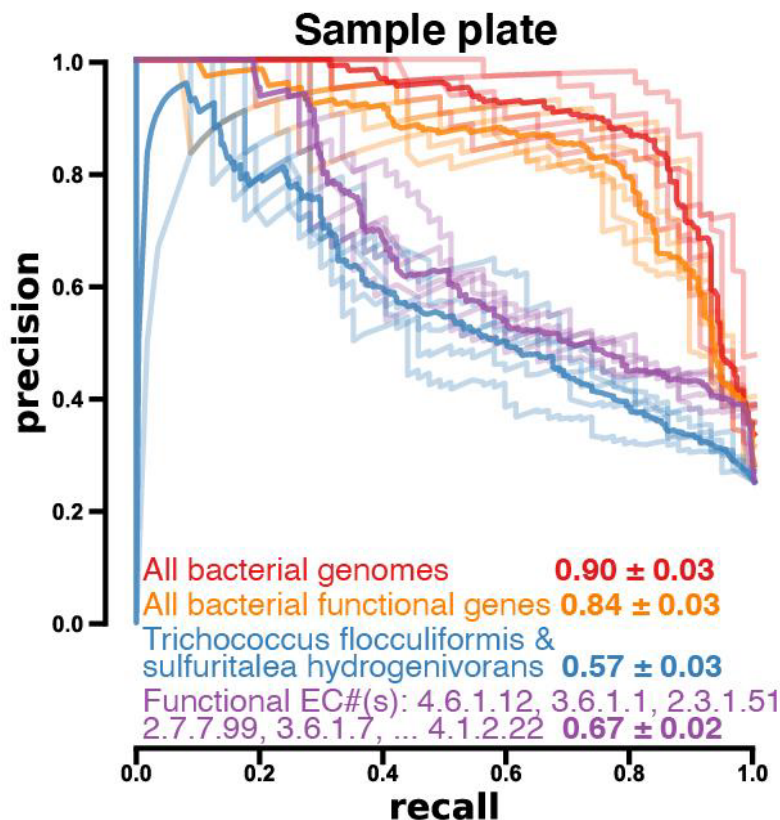

277  
278 **Supplementary Figure S3:** Random forest machine learning 5-fold cross-validation shows a  
279 decrease in precision-recall of samples' processing plate (sample plate) from feature selection  
280 of taxonomic and functional feature tables in comparison to full feature tables, suggesting a  
281 reduction of overfitting on a possible technical confounder. The translucent precision-recall  
282 curve traces of each feature table reflect all 5-fold cross-validation results while the bold trace  
283 represents the average.  
284
